# Supplementary material
Source: MDPI journal article supplement (https://www.mdpi.com/1999-4907/13/10/1575)
Supplement: s1 [file s1]

## Supplementary Materials

**Table S1.** Description of study plots.

| Characteristics                                                            | Study Plots                          |                     |                    |                                             |
|----------------------------------------------------------------------------|--------------------------------------|---------------------|--------------------|---------------------------------------------|
|                                                                            | P1                                   | P1control [P1c]     | P2                 | P2control[P2c]                              |
| Location/ Forest compartment*                                              | 233b<br>FWTP                         | 272i                | 233c<br>FWTP       | 306 a-99                                    |
| Stand composition/ Share of the species in the study plot [by crown cover] | Scots pine 100%                      | Scots pine 100%     | Scots pine 100%    | Scots pine 70%, European oak 20%, Birch 10% |
| The age of the pine trees/<br>Forest habitat                               | Oligotrophic Mixed Coniferous Forest |                     |                    |                                             |
| Soil type                                                                  | Brunic Arenosols                     | Albic Podzols       | Brunic Arenosols   | Eutric/Dystric Brunic Arenosols             |
| Stand density<br>before starting FWTP*<br>in 2020                          | Fully stocked stand                  |                     |                    |                                             |
|                                                                            | Understocked stand                   | Fully stocked stand | Understocked stand | Fully stocked stand                         |
| Tree height [m]                                                            | 25                                   | 30                  | 26                 | 29 m                                        |
| The degree of damage to the stand [%]                                      | 50%                                  | 0%                  | 40%                | 0%                                          |

Explanation: \* Data source: <https://www.bdl.lasy.gov.pl/portal/mapy>; \*\*FWTP – The Forest Wastewater Treatment Plant [FWTP], data about stand density in years before starting FWTP based on Forest Management Plan for Iława Forest District (In Polish) and Habitat Elaborate for Iława Forest District (archival materials in the Iława Forest District).

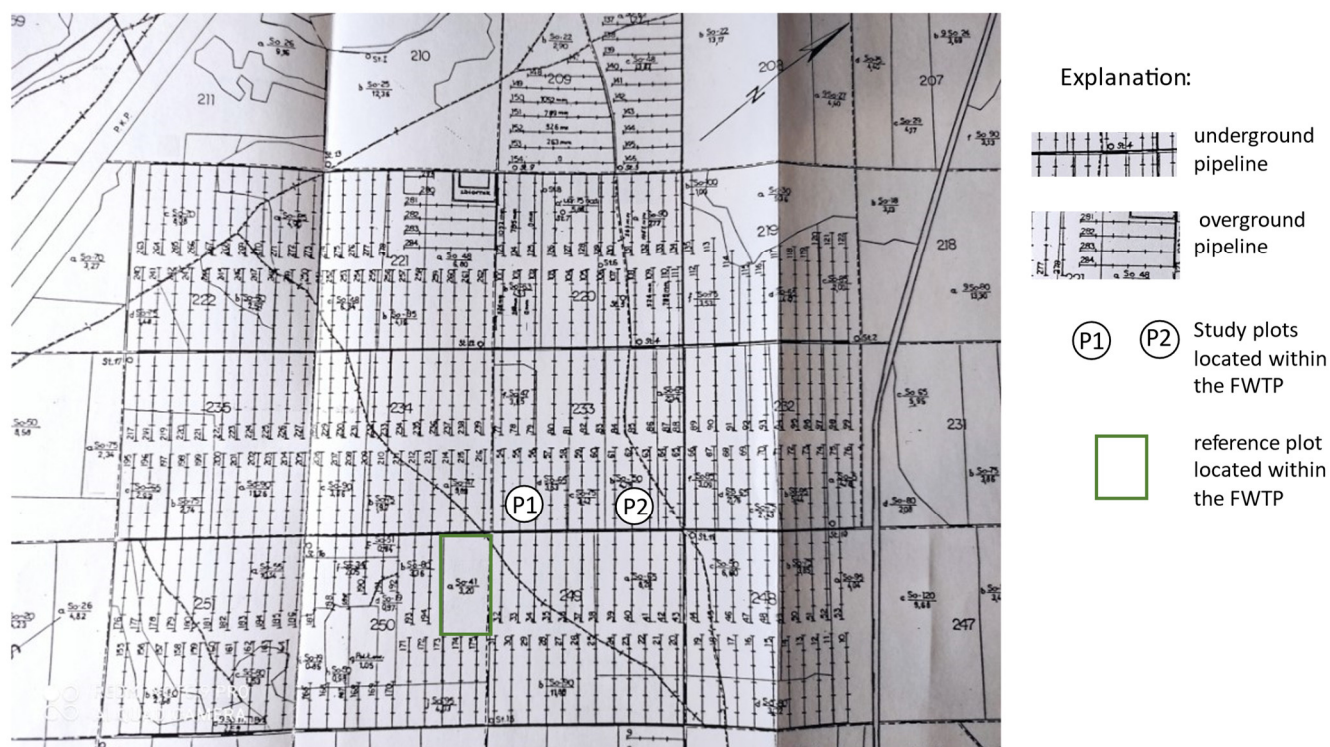

**Figure S1.** Layout diagram of pipelines in the Forest Wastewater Treatment Plant [FWTP], (source: Iława Forest District).

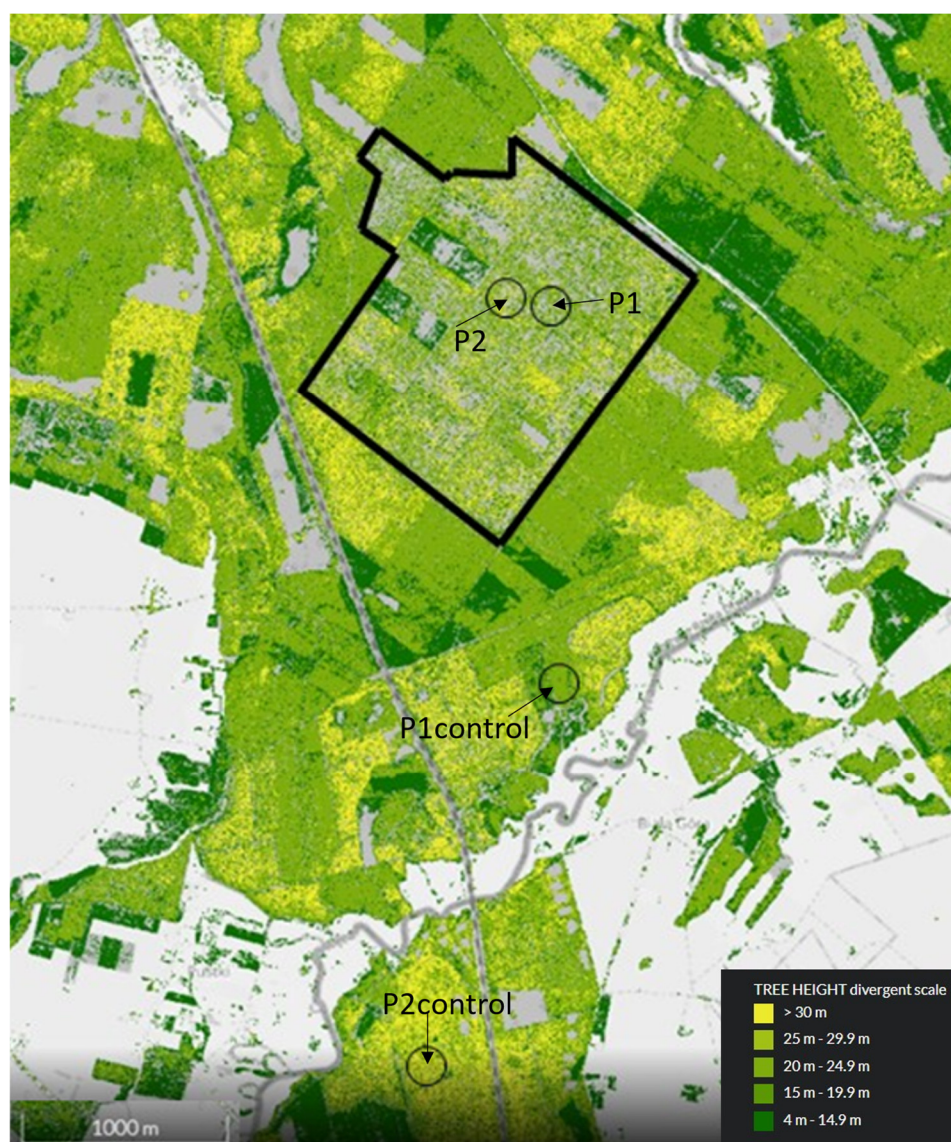

**Figure S2.** The local tree crown map for the Forest Wastewater Treatment Plant and adjacent forest areas (current condition, research plots are marked with circles, the density of pixels reflects the density of the stand (source: <https://mytreemap.com/>).



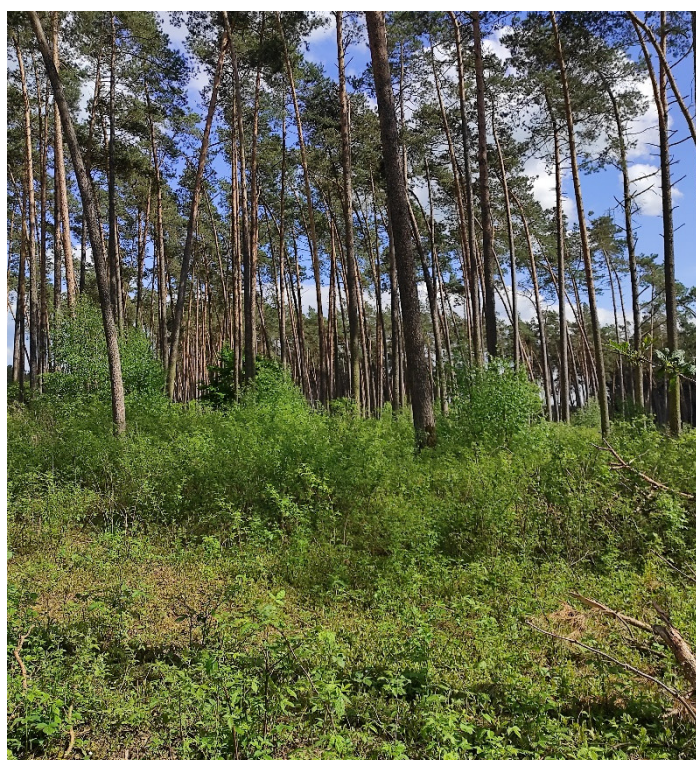

(a) Study plot No.1 [P1]

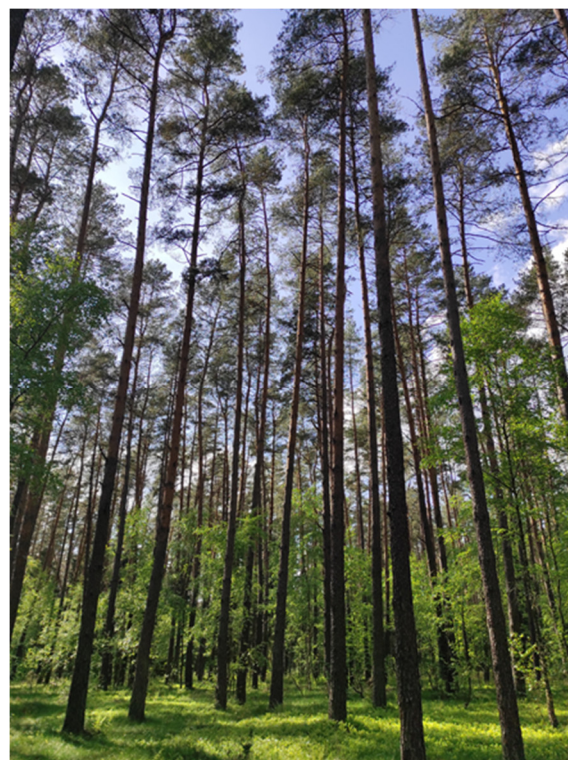

(b) Control plot for P1 [P1c]

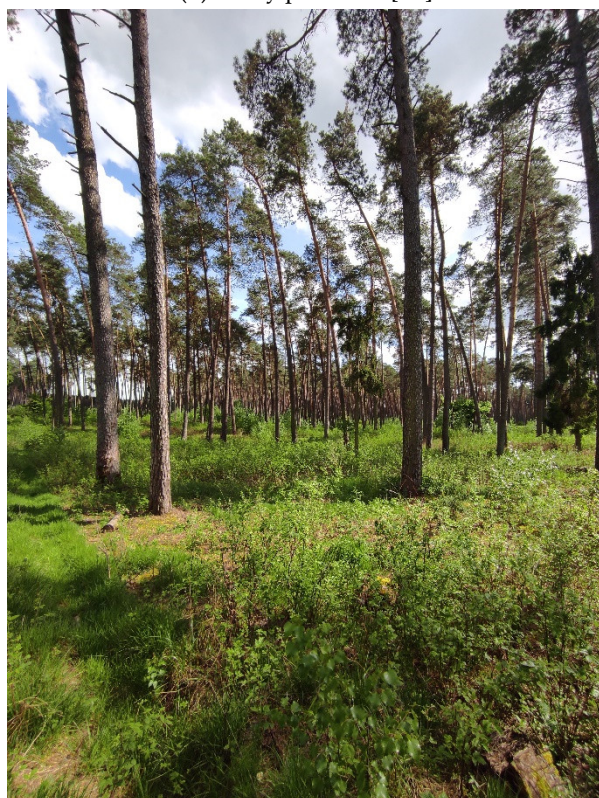

(c) Study plot No.2 [P2]

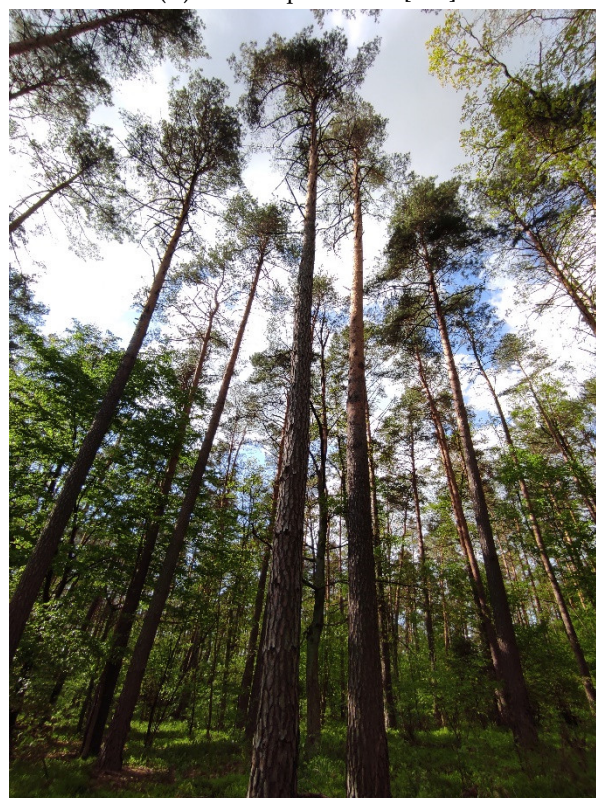

(d) Control plot for P2 [P2c]

**Figure S3.** Photos of study plots (a–d) (May 2020), all photos J. Lendzion, the arrow marks the traces of the pipeline.



**Table S2.** The basic dendrochronological statistics of Scots pine at research plots in different periods.

| Parameter           | Characteristics         | Study plots |            |                |                |                    |            |                |                 |
|---------------------|-------------------------|-------------|------------|----------------|----------------|--------------------|------------|----------------|-----------------|
|                     |                         | Plot 1 [P1] |            |                |                | Control plot - P1c |            |                |                 |
|                     |                         | 1945-2020   | 1960- 1984 | 1985-1995      | 1996-2012      | 1945-2020          | 1960 1984  | 1985-1995      | 1996-2012       |
| Tree-ring width TRW | Mean [mm]               | 1.86        | 1.78       | 2.13           | <b>1.11**</b>  | 2.34               | 1.89       | 1.94           | <b>2.17**</b>   |
|                     | Series intercorrelation | 0.691       | 0.742      | 0.49           | 0.574          | 0.533              | 0.527      | 0.503          | 0.404           |
|                     | Mean sensitivity        | 0.266       | 0.24       | 0.221          | 0.346          | 0.257              | 0.286      | 0.211          | 0.178           |
|                     | Standard deviation      | 0.967       | 1.011      | 0.558          | 0.511          | 1.213              | 1.47       | 0.43           | 0.556           |
|                     | Autocorrelation         | 0.785       | 0.727      | 0.347          | 0.579          | 0.721              | 0.707      | 0.39           | 0.452           |
| Earlywood EW        | Mean [mm]               | 1.22        | 1.05       | <b>1.36**</b>  | <b>0.72**</b>  | 1.45               | 1.12       | <b>1.03**</b>  | <b>1.16**</b>   |
|                     | Series intercorrelation | 0.652       | 0.706      | 0.342          | 0.311          | 0.44               | 0.464      | 0.493          | 0.372           |
|                     | Mean sensitivity        | 0.315       | 0.307      | 0.232          | <b>0.361</b>   | 0.301              | 0.344      | 0.193          | 0.287           |
|                     | Standard deviation      | 0.877       | 1.038      | 0.326          | 0.357          | 1.221              | 1.572      | 0.301          | 0.478           |
|                     | Autocorrelation         | 0.78        | 0.752      | 0.395          | 0.537          | 0.765              | 0.344      | 0.271          | 0.352           |
|                     | Share in TRW [%]        | 65.81       | 58.86      | <b>63.56**</b> | <b>64.37**</b> | 62.09              | 59.09      | <b>53.39**</b> | <b>53.38**</b>  |
| Latewood LW         | Mean [mm]               | 0.64        | 0.73       | 0.78           | <b>0.40**</b>  | 0.89               | 0.77       | 0.90           | <b>1.01**</b>   |
|                     | Series intercorrelation | 0.576       | 0.55       | 0.43           | 0.595          | 0.602              | 0.526      | 0.68           | 0.648           |
|                     | Mean sensitivity        | 0.346       | 0.296      | 0.385          | 0.415          | 0.367              | 0.418      | 0.456          | 0.263           |
|                     | Standard deviation      | 0.322       | 0.231      | 0.315          | 0.298          | 0.336              | 0.444      | 0.276          | 0.288           |
|                     | Autocorrelation         | 0.526       | 0.292      | 0.067          | 0.546          | 0.31               | 0.185      | 0.323          | 0.264           |
|                     | Share in TRW [%]        | 34.19       | 41.14      | <b>36.4</b>    | <b>35.63</b>   | 37.91              | 40.91      | <b>46.61</b>   | <b>46.62</b>    |
|                     | LW/EW ratio             | 0.52        | 0.70       | 0.57           | 0.55           | 0.61               | 0.69       | 0.87           | 0.87            |
|                     |                         | Plot 2 [P2] |            |                |                | Control plot - P2c |            |                |                 |
|                     |                         | 1915-2020   | 1960- 1984 | 1985-1995      | 1996-2012      | 1915-2020          | 1960- 1984 | 1985-1995      | 1996-2012       |
|                     |                         |             |            |                |                |                    |            |                |                 |
| Tree-ring width TRW | Mean [mm]               | 2.07        | 1.39       | <b>2.05**</b>  | <b>1.32**</b>  | 2.17               | 1.572      | <b>1.456**</b> | <b>1.84**</b>   |
|                     | Series intercorrelation | 0.566       | 0.651      | 0.55           | 0.541          | 0.637              | 0.59       | 0.618          | 0.594           |
|                     | Mean sensitivity        | 0.267       | 0.252      | 0.286          | 0.292          | 0.267              | 0.273      | 0.274          | 0.25            |
|                     | Standard deviation      | 1.003       | 0.979      | 0.566          | 0.772          | 1.123              | 1.206      | 0.515          | 0.526           |
|                     | Autocorrelation         | 0.757       | 0.688      | 0.342          | 0.737          | 0.786              | 0.752      | 0.206          | 0.523           |
| Earlywood EW        | Mean [mm]               | 1.19        | 0.823      | <b>1.292**</b> | <b>0.827**</b> | 1.4                | 0.911      | <b>0.818**</b> | <b>1.029**</b>  |
|                     | Series intercorrelation | 0.53        | 0.554      | 0.262          | 0.498          | 0.584              | 0.611      | 0.55           | 0.532           |
|                     | Mean sensitivity        | 0.315       | 0.312      | 0.274          | 0.334          | 0.314              | 0.339      | 0.308          | 0.255           |
|                     | Standard deviation      | 0.854       | 0.893      | 0.343          | 0.49           | 0.933              | 1.055      | 0.359          | 0.301           |
|                     | Autocorrelation         | 0.744       | 0.665      | 0.331          | 0.663          | 0.721              | 0.7        | 0.169          | 0.385           |
|                     | Share in TRW [%]        | 63.30       | 59.02      | 63.06          | <b>62.65**</b> | 64.52              | 57.58      | 56.17          | <b>55.882**</b> |
| Latewood LW         | Mean [mm]               | 0.69        | 0.59       | <b>0.73*</b>   | <b>0.49**</b>  | 0.77               | 0.70       | <b>0.66*</b>   | <b>0.81**</b>   |
|                     | Series intercorrelation | 0.593       | 0.602      | 0.571          | 0.571          | 0.655              | 0.644      | 0.582          | 0.615           |
|                     | Mean sensitivity        | 0.346       | 0.321      | 0.371          | 0.361          | 0.421              | 0.399      | 0.494          | 0.447           |
|                     | Standard deviation      | 0.334       | 0.278      | 0.295          | 0.302          | 0.36               | 0.362      | 0.281          | 0.321           |
|                     | Autocorrelation         | 0.558       | 0.461      | 0.156          | 0.315          | 0.397              | 0.383      | 0.117          | 0.346           |
|                     | Share in TRW [%]        | 36.70       | 40.98      | 36.63          | <b>36.89**</b> | 35.48              | 42.42      | 42.24          | <b>43.98**</b>  |
|                     | LW/EW ratio             | 0.58        | 0.69       | 0.58           | 0.58           | 0.55               | 0.74       | 0.73           | 0.78            |

Asterisks indicate a significant difference amongst mean tree-rings widths of Scots pine on study plots; \* represents that 0.01 < p-value < 0.05; \*\* represents that 0 < p-value < 0.01.

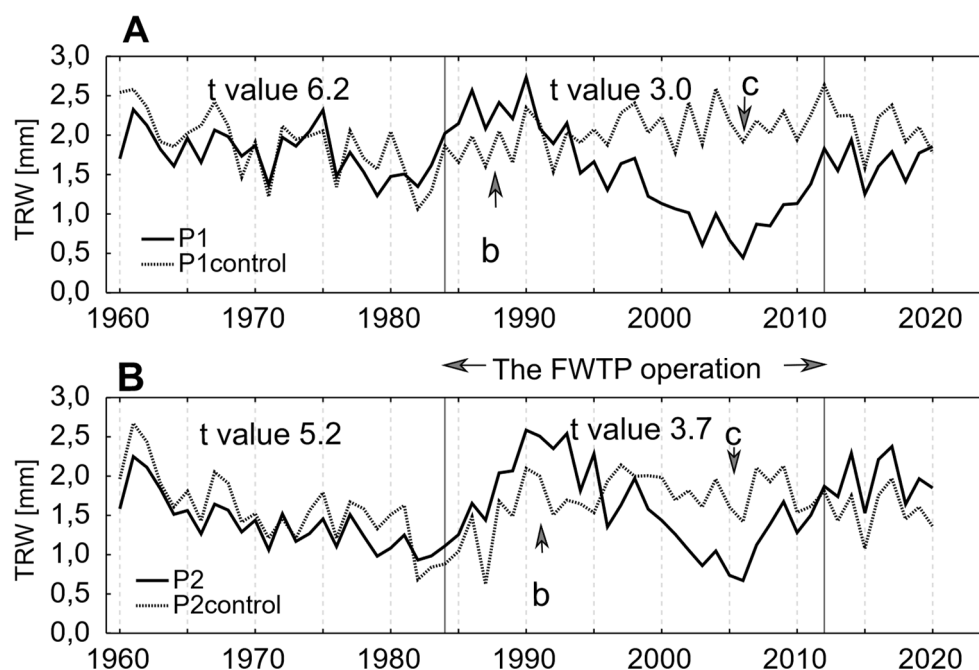

**Figure S4.** Comparison of raw chronologies of Scots pine from study plots. The vertical lines indicate the period of operation of the Forest Wastewater Treatment Plant [FWTP]; A—plots with younger trees; B—plots with older trees. the letters marked: b—the first decade of sprinkling with sewage of stands; c—subsequent years of the fertilization with sewage.

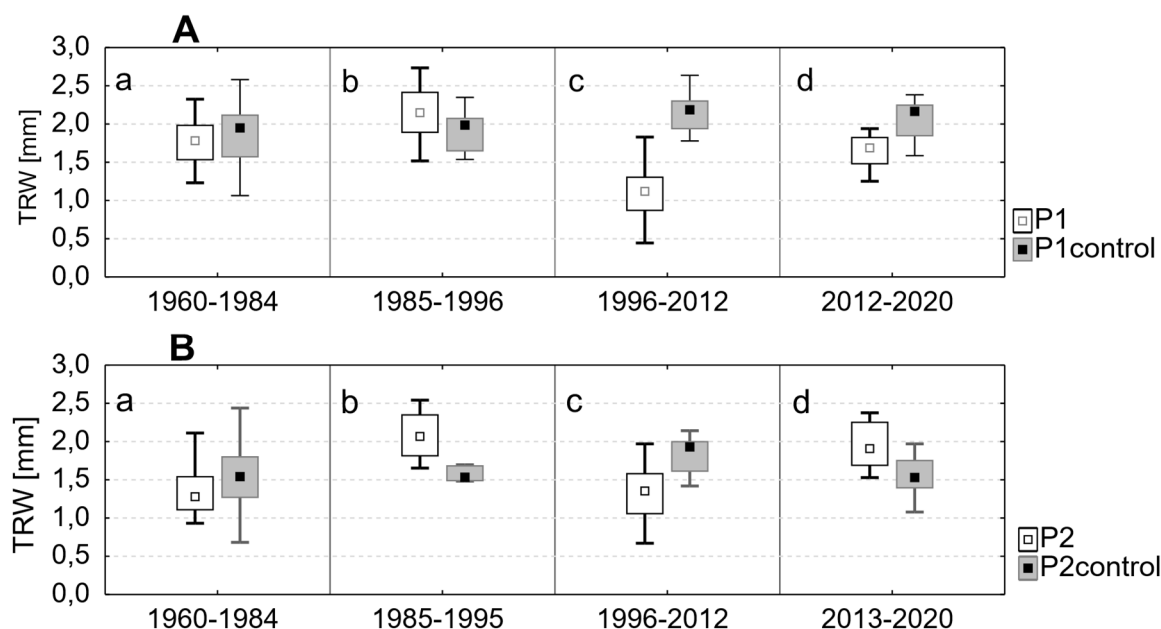

**Figure S5.** Mean tree-ring width [mm] of the study pines in the different tree growth periods: a – 25 years before the start of FWTP activity; b – the first 11 years of the FWTP operation; c – next years of the FWTP operation; d – years after the FWTP was closed. A—plots with younger trees; B—plots with older trees. Asterisks indicate a significant difference amongst mean tree-rings widths of Scots pine on study plots; \* represents that  $0.01 < p\text{-value} < 0.05$ ; \*\* represents that  $0 < p\text{-value} < 0.01$ .
